# Supplementary material for: Learning from pre-pandemic data to forecast viral escape
Source: bioRxiv or medRxiv preprint supplement (doi:10.1101/2022.07.21.501023), 2023-04-12
Supplement: Supplementary file [file media-7.pdf]

## SUPPLEMENTAL TABLE

### **Data Availability**

GISAID Identifier: EPI\_SET\_20220706qk

doi: [10.55876/gis8.220706qk](https://doi.org/10.55876/gis8.220706qk)

All genome sequences and associated metadata in this dataset are published in GISAID's EpiCoV database. To view the contributors of each individual sequence with details such as accession number, Virus name, Collection date, Originating Lab and Submitting Lab and the list of Authors, visit [10.55876/gis8.220706qk](https://gisaid.org/20220706qk)

### **Data Snapshot**

- EPI\_SET\_20220706qk is composed of 11,522,233 individual genome sequences.
- The collection dates range from 2010-12-06 to 2022-06-21;
- Data were collected in 218 countries and territories;
- All sequences in this dataset are compared relative to hCoV-19/Wuhan/WIV04/2019 (WIV04), the official reference sequence employed by GISAID (EPI\_ISL\_402124). Learn more at <https://gisaid.org/WIV04>.
